# Supplementary material for: Measured Adiposity in Relation to Head and Neck Cancer Risk in the European Prospective Investigation into Cancer and Nutrition
Source: Oxford University Press journal article supplement (doi:10.1158/1055-9965.epi-16-0886), 2017-02-09
Supplement: 10559965epi160886-sup-174290_2_supp_3816970_tjk86n.docx [file 10559965epi160886-sup-174290_2_supp_3816970_tjk86n.docx]

| Supplementary Table 1: Measures of adiposity and the risk of HNC among EPIC participants, including adjustment for weight change after baseline | | | | | | | |
| --- | --- | --- | --- | --- | --- | --- | --- |
|  | Men | | |  | **Women** | | |
|  | n cases | Model 1 a | Model 2 b |  | n cases | Model 1 a | Model 2 b |
| **Baseline BMI** |  |  |  |  |  |  |  |
| <22.5 kg/m2 | 51 | 1.59 (1.10 – 2.29) | 1.64 (1.13 – 2.37) |  | 38 | 1.17 (0.73 – 1.86) | 1.18 (0.74 – 1.88) |
| 22.5-24.9 kg/m2 | 69 | 1.0 (reference) | 1.0 (reference) |  | 37 | 1.0 (reference) | 1.0 (reference) |
| 25-29.9 kg/m2 | 174 | 1.11 (0.84 – 1.48) | 1.07 (0.80 – 1.42) |  | 51 | 1.13 (0.74 – 1.75) | 1.11 (0.72 – 1.71) |
| >30 kg/m2 | 54 | 1.01 (0.70 – 1.48) | 0.90 (0.62 – 1.32) |  | 22 | 1.14 (0.66 – 2.00) | 1.05 (0.60 – 1.86) |
|  |  |  |  |  |  |  |  |
| **Smoking status** |  |  |  |  |  |  |  |
| **Never**  **Baseline BMI** |  |  |  |  |  |  |  |
| <22.5 kg/m2 | 4 | 0.88 (0.26 – 2.91) | 0.90 (0.27 – 3.00) |  | 9 | 0.80 (0.33 – 1.89) | 0.80 (0.33 – 1.89) |
| 22.5-24.9 kg/m2 | 9 | 1.0 (reference) | 1.0 (reference) |  | 13 | 1.0 (reference) | 1.0 (reference) |
| 25-29.9 kg/m2 | 19 | 1.31 (0.58 – 2.97) | 1.24 (0.55 – 2.81) |  | 19 | 0.96 (0.47 – 1.98) | 0.95 (0.46 – 1.96) |
| >30 kg/m2 | 7 | 1.60 (0.57 – 4.50) | 1.36 (0.48 – 3.90) |  | 13 | 1.34 (0.59 – 3.03) | 1.25 (0.54 – 2.89) |
| **Former**  **Baseline BMI** |  |  |  |  |  |  |  |
| <22.5 kg/m2 | 9 | 2.05 (0.88 – 4.78) | 2.11 (0.91 – 4.93) |  | 4 | 0.50 (0.15 – 1.64) | 0.51 (0.16 – 1.66) |
| 22.5-24.9 kg/m2 | 14 | 1.0 (reference) | 1.0 (reference) |  | 10 | 1.0 (reference) | 1.0 (reference) |
| 25-29.9 kg/m2 | 57 | 1.54 (0.85 – 2.79) | 1.48 (0.82 – 2.68) |  | 16 | 1.35 (0.60 – 3.03) | 1.31 (0.58 – 2.95) |
| >30 kg/m2 | 16 | 1.44 (0.69 – 3.02) | 1.31 (0.62 – 2.78) |  | 4 | 0.90 (0.28 – 2.96) | 0.79 (0.24 – 2.59) |
| **Current**  **Baseline BMI** |  |  |  |  |  |  |  |
| <22.5 kg/m2 | 38 | 1.56 (1.01 – 2.43) | 1.62 (1.04 – 2.52) |  | 25 | 2.01 (1.01 – 3.99) | 2.06 (1.04 – 4.10) |
| 22.5-24.9 kg/m2 | 46 | 1.0 (reference) | 1.0 (reference) |  | 14 | 1.0 (reference) | 1.0 (reference) |
| 25-29.9 kg/m2 | 98 | 0.94 (0.65 – 1.35) | 0.90 (0.63 – 1.30) |  | 16 | 1.21 (0.58 – 2.54) | 1.18 (0.57 – 2.48) |
| >30 kg/m2 | 31 | 0.82 (0.50 – 1.33) | 0.72 (0.44 – 1.19) |  | 5 | 0.90 (0.31 – 2.68) | 0.81 (0.27 – 2.45) |
| Interaction by smoking status: | | 0.60 | 0.55 |  |  | 0.21 | 0.21 |
| a Cox regression models stratified by age, sex, centre and smoking status, adjusted for education and alcohol intake  b Same covariates as model 1, further adjusted for self-reported difference in weight over time (kg/year) | | | | | | | | |
