# Supplementary material for: Measured Adiposity in Relation to Head and Neck Cancer Risk in the European Prospective Investigation into Cancer and Nutrition
Source: Oxford University Press journal article supplement (doi:10.1158/1055-9965.epi-16-0886), 2017-02-09
Supplement: 10559965epi160886-sup-174290_2_supp_3816971_tjk86n.docx [file 10559965epi160886-sup-174290_2_supp_3816971_tjk86n.docx]

| Supplementary Table 3: Measures of adiposity and the risk of HNC in the EPIC study, excluding Oxford participants with calibrated self-reported anthropometry | | | | | | | | | | |
| --- | --- | --- | --- | --- | --- | --- | --- | --- | --- | --- |
|  |  | All participants |  | Never |  | Former |  | | Current |  |
| **Men** | n cases | HR (95% CI) a | n cases | HR (95% CI) b | n cases | HR (95% CI) b | n cases | HR (95% CI) b | | *p* for interaction by smoking status |
|  |  |  |  |  |  |  |  | |
| BMI |  | | | | | | | | |
| <22.5 kg/m2 | 90 | 1.68 (1.27 – 2.21) | 6 | 1.45 (0.53 – 4.00) | 13 | 1.58 (0.81 – 3.07) | 71 | | 1.68 (1.22 – 2.32) | 0.88 |
| 22.5-24.9 kg/m2 | 125 | 1.0 (ref) | 11 | 1.0 (ref) | 28 | 1.0 (ref) | 86 | | 1.0 (ref) |  |
| 25-29.9 kg/m2 | 264 | 0.93 (0.75 – 1.15) | 24 | 1.16 (0.56 – 2.41) | 84 | 1.06 (0.69 – 1.64) | 156 | | 0.86 (0.65 – 1.13) |  |
| >30 kg/m2 | 91 | 0.90 (0.68 – 1.19) | 8 | 1.22 (0.47 – 3.14) | 31 | 1.15 (0.68 – 1.96) | 52 | | 0.78 (0.54 – 1.12) |  |
|  |  |  |  |  |  |  |  | |  |  |
| WC (per 5 cm) | 570 | 0.98 (0.94 – 1.02) | 49 | 0.95 (0.81 – 1.10) | 156 | 1.05 (0.97-1.14) | 365 | | 0.96 (0.91 – 1.01) | 0.30 |
| + adjusted for BMI |  | 1.18 (1.08 – 1.28) |  | 0.77 (0.58 – 1.03) |  | 1.21 (1.03 – 1.42) |  | | 1.23 (1.11 – 1.37) |  |
|  |  |  |  |  |  |  |  | |  |  |
| WHR (per 0.1 unit) | 570 | 1.15 (0.99 – 1.32) | 49 | 0.95 (0.58 – 1.56) | 156 | 1.22 (0.94 – 1.60) | 365 | | 1.15 (0.97 – 1.37) | 0.67 |
| + adjusted for BMI |  | 1.43 (1.23 – 1.67) |  | 0.89 (0.49 – 1.60) |  | 1.32 (0.98 – 1.78) |  | | 1.58 (1.31 – 1.90) |  |
|  |  |  |  |  |  |  |  | |  |  |
| **Women** |  |  |  |  |  |  |  | |  |  |
| BMI |  |  |  |  |  |  |  | |  |  |
| <22.5 kg/m2 | 58 | 1.58 (1.06 – 2.36) | 11 | 1.34 (0.58 – 3.12) | 9 | 0.82 (0.35 – 1.93) | 38 | | 2.29 (1.30 – 4.04) | 0.20 |
| 22.5-24.9 kg/m2 | 44 | 1.0 (ref) | 11 | 1.0 (ref) | 14 | 1.0 (ref) | 19 | | 1.0 (ref) |  |
| 25-29.9 kg/m2 | 82 | 1.38 (0.95 – 2.01) | 30 | 1.56 (0.78 – 3.15) | 18 | 0.86 (0.42 – 1.77) | 34 | | 1.74 (0.99 – 3.08) |  |
| >30 kg/m2 | 39 | 1.50 (0.96 – 2.35) | 22 | 2.25 (1.06 -4.77) | 7 | 0.83 (0.33 – 2.12) | 10 | | 1.28 (0.58 – 2.83) |  |
|  |  |  |  |  |  |  |  | |  |  |
| WC (per 5 cm) | 223 | 1.08 (1.02 – 1.15) | 74 | 1.12 (1.01 – 1.25) | 48 | 1.01 (0.87 – 1.16) | 101 | | 1.09 (0.99 – 1.19) | 0.39 |
| + adjusted for BMI |  | 1.37 (1.22 – 1.54) |  | 1.17 (0.96 – 1.43) |  | 1.07 (0.82 – 1.39) |  | | 1.78 (1.50 – 2.11) |  |
|  |  |  |  |  |  |  |  | |  |  |
| WHR (per 0.1 unit) | 223 | 1.64 (1.38 – 1.95) | 74 | 1.26 (0.89 – 1.79) | 48 | 1.02 (0.64 – 1.63) | 101 | | 2.09 (1.69 – 2.60) | 0.003 |
| + adjusted for BMI |  | 1.78 (1.49 – 2.12) |  | 1.15 (0.79 – 1.70) |  | 1.06 (0.64 – 1.77) |  | | 2.51 (2.00 – 3.15) |  |
| a Cox regression models stratified by age, sex, centre and smoking status, adjusted for education and alcohol intake  b Cox regression models stratified by age, sex, centre, adjusted for education and alcohol intake | | | | | | | | | | |
